# Supplementary material for: Genetic variations of HvP5CS1 and their association with drought tolerance related traits in barley (Hordeum vulgare L.)
Source: PubMed Central journal article supplement (PMC5554244; doi:10.1038/s41598-017-08393-0), 2017-08-11
Supplement: 41598_2017_8393_MOESM1_ESM.pdf [file 41598_2017_8393_MOESM1_ESM.pdf]

## Genetic variations of *HvP5CS1* and their association with drought tolerance related traits in barley (*Hordeum vulgare* L.)

Yanshi Xia<sup>1,+</sup>, Ronghua Li<sup>1,+</sup>, Guihua Bai<sup>2</sup>, Kadambot H.M Siddique<sup>3</sup>, Rajeev Varshney<sup>4</sup>, Michael Baum<sup>5</sup>, Guijun Yan<sup>3,6</sup> and Peiguo Guo<sup>1\*</sup>

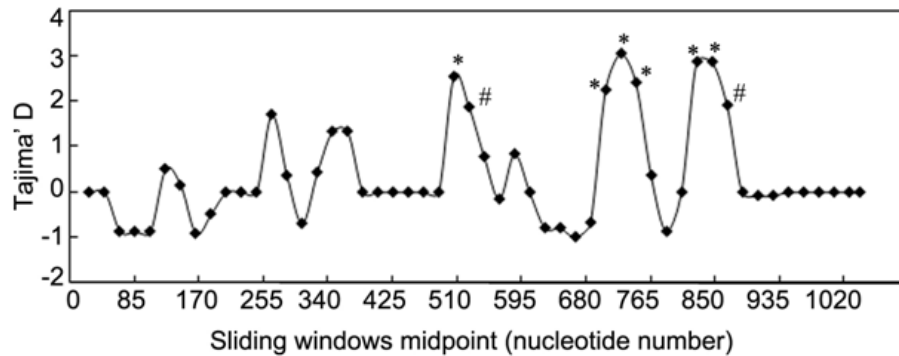

**Figure S1.** A sliding window plot of Tajima's D value in the targeted region of *HvP5CS1*. A window size of 50 nucleotides with a step size of 20 nucleotides was used to estimate Tajima's D using DnaSP 5.0. An asterisk (\*) on the point of a measurement indicates significance at  $P < 0.05$ . The hash symbol (#) on the point of a measurement indicates significance at  $P < 0.10$ .

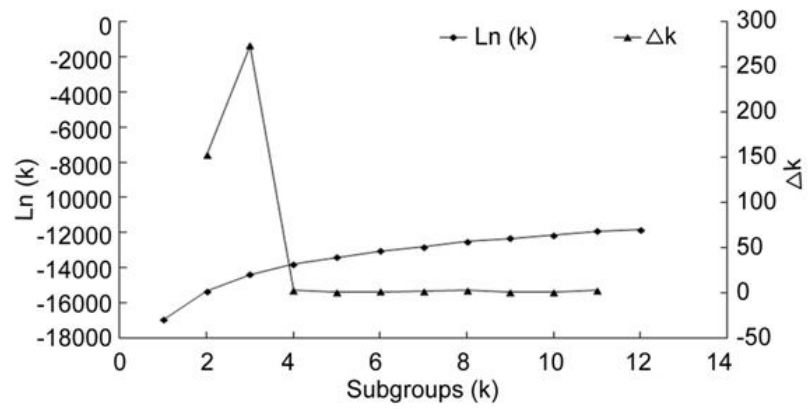

**Figure S2. Comparison of statistical approaches used to determine the genetic background structure of the population.**  $\text{Ln}(K)$  was calculated using Structure software, and  $\Delta K$  was calculated as described by Evanno et al.<sup>58</sup>.

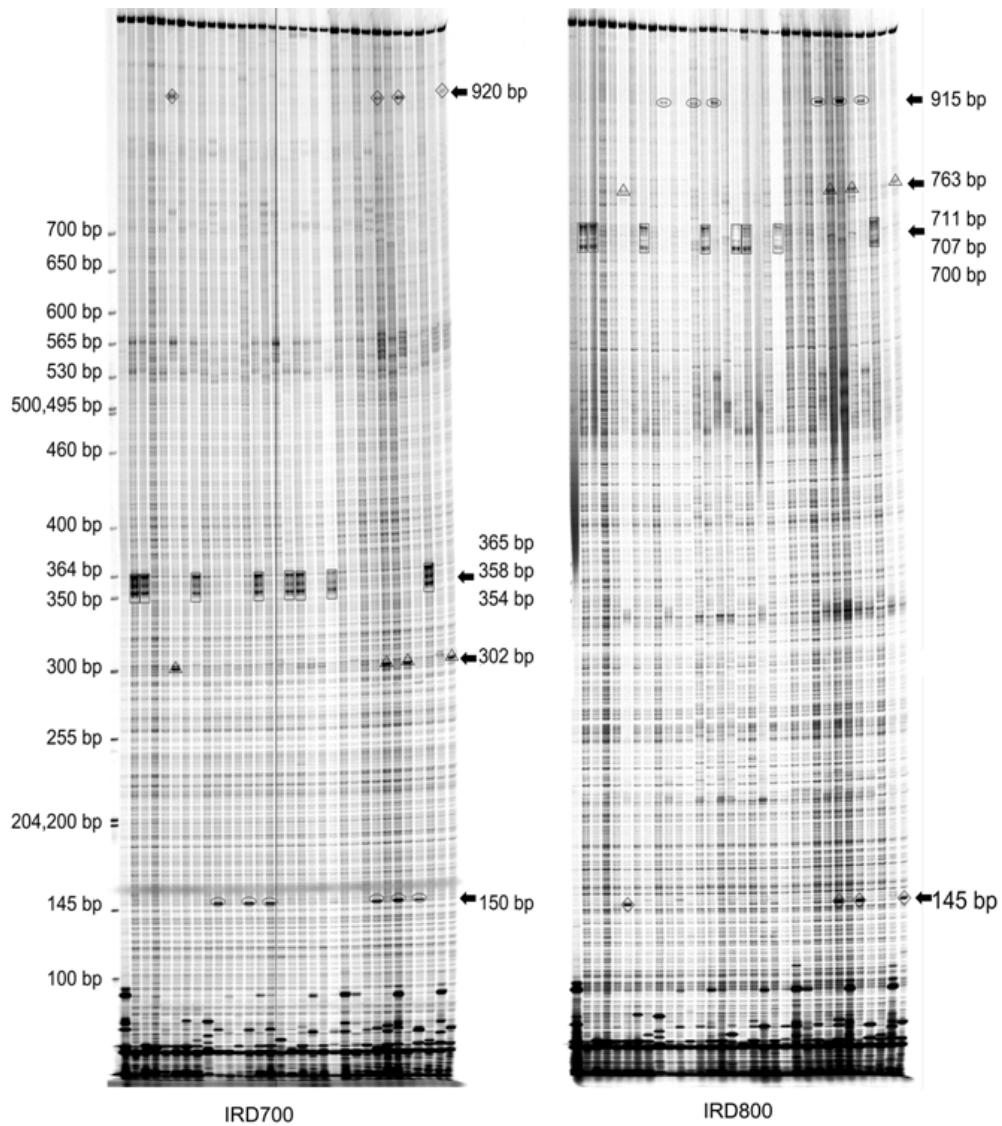

**Figure S3. Detection of polymorphisms for part of the *HvP5CS1* gene sequences using EcoTILLING.** The IR Dye 700 and IR Dye 800 channels are shown on the left and right, respectively. The specific cleavage products appear as intense bands. For any one nucleotide polymorphism, the sizes of the IRD 700 labeled and the IRD 800 labeled cleaved fragments should add up to the size of the uncut PCR product (1065 bp). Six nucleotide polymorphisms are shown, each with a corresponding fragment in the complementary fluorescent channel marked by the same box pattern. The sizes of the DNA ladders and digested PCR products are labeled with corresponding numbers and the units are bp.

**Table S1** Distribution of polymorphic SNPs across 13 haplotypes. SNPs relative to the most common sequence are indicated in boldface. The number of SNP positions is relative to the sequence on PCR amplicon of reference DNA (ICARDA IG: 138264). A *horizontal dash* indicates the absence of the indicated bases.

| Haplotypes | SNP position |          |          |          |          |          |          |          |     |       |      |     |     |     |     |     |     |     |     |     |
|------------|--------------|----------|----------|----------|----------|----------|----------|----------|-----|-------|------|-----|-----|-----|-----|-----|-----|-----|-----|-----|
|            | 98           | 150      | 162      | 174      | 288      | 302      | 305      | 315      | 354 | 358   | 365  | 537 | 539 | 541 | 543 | 555 | 558 | 564 | 566 | 568 |
| H1         | A            | <b>T</b> | C        | C        | <b>A</b> | T        | G        | G        | CAA | TATAT | TTCT | –   | –   | –   | –   | TG  | AT  | T   | T   | TCT |
| H2         | A            | G        | C        | C        | G        | T        | G        | G        | CAA | TATAT | TTCT | T   | G   | A   | ATT | TG  | AT  | T   | T   | TCT |
| H3         | A            | G        | C        | C        | G        | T        | G        | G        | –   | –     | –    | T   | G   | A   | ATT | TG  | AT  | T   | T   | TCT |
| H4         | A            | G        | C        | C        | G        | <b>C</b> | G        | G        | CAA | TATAT | TTCT | T   | G   | A   | ATT | TG  | AT  | T   | T   | TCT |
| H5         | A            | G        | C        | C        | G        | T        | <b>A</b> | G        | CAA | TATAT | TTCT | T   | G   | A   | ATT | TG  | AT  | T   | T   | TCT |
| H6         | A            | <b>T</b> | C        | C        | <b>A</b> | T        | G        | G        | CAA | TATAT | TTCT | –   | –   | –   | –   | TG  | AT  | T   | T   | TCT |
| H7         | A            | G        | C        | <b>T</b> | G        | T        | G        | G        | CAA | TATAT | TTCT | T   | G   | A   | ATT | TG  | AT  | T   | T   | TCT |
| H8         | A            | G        | C        | <b>T</b> | <b>A</b> | T        | G        | G        | CAA | TATAT | TTCT | T   | G   | A   | ATT | TG  | AT  | T   | T   | TCT |
| H9         | A            | G        | C        | C        | G        | T        | G        | G        | –   | –     | –    | T   | G   | A   | ATT | TG  | AT  | T   | T   | TCT |
| H10        | A            | G        | C        | C        | <b>A</b> | T        | G        | G        | CAA | TATAT | TTCT | –   | –   | –   | –   | TG  | AT  | T   | T   | TCT |
| H11        | <b>G</b>     | <b>G</b> | C        | C        | G        | T        | G        | <b>T</b> | CAA | TATAT | TTCT | T   | G   | A   | ATT | TG  | AT  | T   | T   | TCT |
| H12        | A            | G        | <b>T</b> | C        | G        | T        | G        | G        | CAA | TATAT | TTCT | T   | G   | A   | ATT | –   | –   | –   | –   | –   |
| H13        | A            | <b>T</b> | C        | C        | G        | T        | <b>A</b> | G        | CAA | TATAT | TTCT | T   | G   | A   | ATT | TG  | AT  | T   | T   | TCT |

  

| Haplotypes | SNP position |     |     |     |        |       |          |          |     |          |          |          |          |          |          |          |          |          |          | Total |
|------------|--------------|-----|-----|-----|--------|-------|----------|----------|-----|----------|----------|----------|----------|----------|----------|----------|----------|----------|----------|-------|
|            | 570          | 573 | 577 | 578 | 581    | 588   | 656      | 697      | 735 | 736      | 737      | 768      | 778      | 846      | 847      | 848      | 917      | 920      | 926      |       |
| H1         | –            | –   | –   | CA  | –      | –     | G        | T        | TT  | CT       | CC       | <b>C</b> | T        | AT       | CG       | TT       | T        | T        | T        | 78    |
| H2         | T            | GCA | GC  | CA  | TGTCTC | TTATA | G        | T        | T   | <b>C</b> | <b>C</b> | G        | T        | <b>G</b> | <b>C</b> | <b>T</b> | T        | T        | T        | 61    |
| H3         | –            | –   | –   | CA  | –      | –     | G        | T        | T   | <b>C</b> | <b>C</b> | G        | T        | <b>G</b> | <b>T</b> | <b>T</b> | T        | T        | T        | 50    |
| H4         | –            | –   | –   | CA  | –      | –     | G        | T        | TT  | CT       | CC       | G        | T        | AT       | CG       | TT       | T        | <b>G</b> | T        | 44    |
| H5         | –            | –   | –   | CA  | –      | –     | G        | T        | TT  | CT       | CC       | G        | T        | AT       | CG       | TT       | <b>C</b> | T        | T        | 19    |
| H6         | –            | –   | –   | CA  | –      | –     | G        | T        | TT  | CT       | CC       | G        | T        | AT       | CG       | TT       | T        | T        | T        | 11    |
| H7         | –            | –   | –   | CA  | –      | –     | G        | <b>C</b> | TT  | CT       | CC       | G        | T        | AT       | CG       | TT       | T        | T        | <b>C</b> | 6     |
| H8         | –            | –   | –   | CA  | –      | –     | G        | T        | TT  | CT       | CC       | G        | T        | AT       | CG       | TT       | T        | T        | T        | 5     |
| H9         | –            | –   | –   | CA  | –      | –     | <b>A</b> | T        | T   | <b>C</b> | <b>C</b> | G        | T        | <b>G</b> | <b>T</b> | <b>T</b> | T        | T        | T        | 4     |
| H10        | –            | –   | –   | CA  | –      | –     | G        | T        | T   | <b>C</b> | <b>C</b> | G        | T        | AT       | CG       | TT       | T        | <b>G</b> | T        | 3     |
| H11        | –            | –   | –   | CA  | –      | –     | G        | T        | TT  | CT       | CC       | G        | T        | AT       | CG       | TT       | T        | T        | T        | 2     |
| H12        | T            | –   | GC  | –   | TGT    | TTATA | G        | T        | TT  | CT       | CC       | G        | <b>A</b> | AT       | CG       | TT       | T        | T        | T        | 2     |
| H13        | –            | –   | –   | CA  | –      | –     | G        | T        | TT  | CT       | CC       | G        | T        | AT       | CG       | TT       | <b>C</b> | T        | T        | 2     |

**Table S2** Frequency of *HvP5CSI* haplotypes in different geographic barley growing regions.

| Haplotype          | Overall<br>(287) | Geographic regions <sup>a</sup> |              |            |              |              |              |              |
|--------------------|------------------|---------------------------------|--------------|------------|--------------|--------------|--------------|--------------|
|                    |                  | AFR<br>(55)                     | APS<br>(14)  | AUS<br>(2) | EUR<br>(9)   | MEA<br>(55)  | NEA<br>(106) | UNK<br>(46)  |
| <i>HvP5CSI_H1</i>  | 0.272            | 0.031                           | <b>0.014</b> | –          | –            | 0.031        | <b>0.171</b> | 0.024        |
| <i>HvP5CSI_H2</i>  | 0.213            | 0.059                           | 0.010        | 0.003      | 0.003        | <b>0.063</b> | 0.014        | <b>0.059</b> |
| <i>HvP5CSI_H3</i>  | 0.174            | 0.024                           | <b>0.014</b> | 0.003      | <b>0.014</b> | 0.014        | 0.059        | 0.045        |
| <i>HvP5CSI_H4</i>  | 0.153            | <b>0.070</b>                    | –            | –          | <b>0.014</b> | 0.014        | 0.049        | 0.003        |
| <i>HvP5CSI_H5</i>  | 0.066            | –                               | –            | –          | –            | 0.035        | 0.014        | 0.017        |
| <i>HvP5CSI_H6</i>  | 0.038            | 0.003                           | –            | –          | –            | 0.010        | 0.021        | 0.003        |
| <i>HvP5CSI_H7</i>  | 0.021            | –                               | –            | –          | –            | –            | 0.014        | 0.007        |
| <i>HvP5CSI_H8</i>  | 0.017            | –                               | –            | –          | –            | 0.010        | 0.007        | –            |
| <i>HvP5CSI_H9</i>  | 0.014            | 0.003                           | 0.001        | –          | –            | –            | 0.003        | –            |
| <i>HvP5CSI_H10</i> | 0.010            | –                               | –            | –          | –            | –            | 0.010        | –            |
| <i>HvP5CSI_H11</i> | 0.007            | –                               | –            | –          | –            | 0.007        | –            | –            |
| <i>HvP5CSI_H12</i> | 0.007            | –                               | –            | –          | –            | –            | 0.007        | –            |
| <i>HvP5CSI_H13</i> | 0.007            | –                               | –            | –          | –            | 0.007        | –            | –            |

<sup>a</sup>Haplotypes are ordered by overall frequency in all barley accessions. AFR: Africa, APS: Arabian Peninsula, AUS: Australia, EUR: Europe, MEA: Middle East Asia, NEA: North East Asia, UNK: country of origin not known. The number in brackets indicates the number of plants scored. Most frequent haplotypes within each population are highlighted in bold.

**Table S3** General information on the barley accessions used in this study

| ICARDA<br>IG | Origin<br>country <sup>a</sup> | Donor<br>county | Genotype description (species)                        | Ear type |
|--------------|--------------------------------|-----------------|-------------------------------------------------------|----------|
| 16981        | TKM                            | USA             | <i>Hordeum vulgare</i> subsp. vulgare convar. vulgare | 6-row    |
| 17424        | SCG                            | USA             | <i>Hordeum vulgare</i> subsp. vulgare convar. vulgare | 6-row    |
| 18767        | TUR                            | USA             | <i>Hordeum vulgare</i> subsp. vulgare convar. vulgare | 6-row    |
| 18983        | GRC                            | USA             | <i>Hordeum vulgare</i> subsp. vulgare convar. vulgare | 6-row    |
| 19390        | CHN                            | USA             | <i>Hordeum vulgare</i> subsp. vulgare convar. vulgare | 6-row    |
| 19391        | CHN                            | USA             | <i>Hordeum vulgare</i> subsp. vulgare convar. vulgare | 6-row    |
| 19453        | IRN                            | USA             | <i>Hordeum vulgare</i> subsp. vulgare convar. vulgare | 6-row    |
| 19687        | CHN                            | USA             | <i>Hordeum vulgare</i> subsp. vulgare convar. vulgare | 6-row    |
| 20905        | AFG                            | USA             | <i>Hordeum vulgare</i> subsp. vulgare convar. vulgare | 6-row    |
| 23248        | ETH                            | USA             | <i>Hordeum vulgare</i> subsp. vulgare convar. vulgare | 6-row    |
| 23515        | ETH                            | USA             | <i>Hordeum vulgare</i> subsp. vulgare convar. vulgare | 6-row    |
| 24634        | DZA                            | USA             | <i>Hordeum vulgare</i> subsp. vulgare convar. vulgare | 6-row    |
| 24745        | AZE                            | USA             | <i>Hordeum vulgare</i> subsp. vulgare convar. vulgare | 6-row    |
| 24746        | TKM                            | USA             | <i>Hordeum vulgare</i> subsp. vulgare convar. vulgare | 6-row    |
| 24751        | CHN                            | USA             | <i>Hordeum vulgare</i> subsp. vulgare convar. vulgare | 6-row    |
| 24764        | CHN                            | USA             | <i>Hordeum vulgare</i> subsp. vulgare convar. vulgare | 6-row    |
| 24774        | CHN                            | USA             | <i>Hordeum vulgare</i> subsp. vulgare convar. vulgare | 6-row    |
| 24953        | LBY                            | USA             | <i>Hordeum vulgare</i> subsp. vulgare convar. vulgare | 6-row    |
| 25704        | IND                            | USA             | <i>Hordeum vulgare</i> subsp. vulgare convar. vulgare | 6-row    |
| 25839        | EGY                            | USA             | <i>Hordeum vulgare</i> subsp. vulgare convar. vulgare | 6-row    |
| 25883        | AFG                            | USA             | <i>Hordeum vulgare</i> subsp. vulgare convar. vulgare | 6-row    |
| 26002        | AZE                            | USA             | <i>Hordeum vulgare</i> subsp. vulgare convar. vulgare | 6-row    |
| 26055        | CHN                            | USA             | <i>Hordeum vulgare</i> subsp. vulgare convar. vulgare | 6-row    |
| 26056        | CHN                            | USA             | <i>Hordeum vulgare</i> subsp. vulgare convar. vulgare | 6-row    |
| 26172        | CHN                            | USA             | <i>Hordeum vulgare</i> subsp. vulgare convar. vulgare | 6-row    |
| 26178        | CHN                            | USA             | <i>Hordeum vulgare</i> subsp. vulgare convar. vulgare | 6-row    |
| 26229        | CHN                            | USA             | <i>Hordeum vulgare</i> subsp. vulgare convar. vulgare | 6-row    |
| 26276        | IRQ                            | USA             | <i>Hordeum vulgare</i> subsp. vulgare convar. vulgare | 6-row    |
| 26727        | AZE                            | USA             | <i>Hordeum vulgare</i> subsp. vulgare convar. vulgare | 6-row    |
| 27076        | CHN                            | USA             | <i>Hordeum vulgare</i> subsp. vulgare convar. vulgare | 6-row    |
| 27630        | PAK                            | USA             | <i>Hordeum vulgare</i> subsp. vulgare convar. vulgare | 6-row    |
| 27649        | IRN                            | USA             | <i>Hordeum vulgare</i> subsp. vulgare convar. vulgare | 6-row    |
| 27653        | IRN                            | USA             | <i>Hordeum vulgare</i> subsp. vulgare convar. vulgare | 6-row    |
| 27683        | AFG                            | USA             | <i>Hordeum vulgare</i> subsp. vulgare convar. vulgare | 6-row    |
| 27773        | IRN                            | USA             | <i>Hordeum vulgare</i> subsp. vulgare convar. vulgare | 6-row    |
| 27790        | IRN                            | USA             | <i>Hordeum vulgare</i> subsp. vulgare convar. vulgare | 6-row    |
| 27794        | IRN                            | USA             | <i>Hordeum vulgare</i> subsp. vulgare convar. vulgare | 6-row    |
| 27799        | AFG                            | USA             | <i>Hordeum vulgare</i> subsp. vulgare convar. vulgare | 6-row    |
| 27803        | AFG                            | USA             | <i>Hordeum vulgare</i> subsp. vulgare convar. vulgare | 6-row    |
| 29097        | JOR                            | SYR             | <i>Hordeum vulgare</i> subsp. vulgare convar. vulgare | 6-row    |
| 31406        | SYR                            | SYR             | <i>Hordeum vulgare</i> subsp. vulgare convar. vulgare | 6-row    |

|       |     |     |                                                       |       |
|-------|-----|-----|-------------------------------------------------------|-------|
| 31410 | SYR | SYR | <i>Hordeum vulgare</i> subsp. vulgare convar. vulgare | 6-row |
| 31870 | MAR | MAR | <i>Hordeum vulgare</i> subsp. vulgare convar. vulgare | 6-row |
| 31876 | MAR | MAR | <i>Hordeum vulgare</i> subsp. vulgare convar. vulgare | 6-row |
| 31923 | MAR | MAR | <i>Hordeum vulgare</i> subsp. vulgare convar. vulgare | 6-row |
| 31938 | MAR | MAR | <i>Hordeum vulgare</i> subsp. vulgare convar. vulgare | 6-row |
| 32475 | EGY | SYR | <i>Hordeum vulgare</i> subsp. vulgare convar. vulgare | 6-row |
| 32482 | EGY | SYR | <i>Hordeum vulgare</i> subsp. vulgare convar. vulgare | 6-row |
| 32488 | EGY | SYR | <i>Hordeum vulgare</i> subsp. vulgare convar. vulgare | 6-row |
| 32601 | PAK | SYR | <i>Hordeum vulgare</i> subsp. vulgare convar. vulgare | 6-row |
| 32608 | PAK | SYR | <i>Hordeum vulgare</i> subsp. vulgare convar. vulgare | 6-row |
| 32618 | PAK | SYR | <i>Hordeum vulgare</i> subsp. vulgare convar. vulgare | 6-row |
| 32708 | SYR | SYR | <i>Hordeum vulgare</i> subsp. vulgare convar. vulgare | 6-row |
| 32711 | SYR | SYR | <i>Hordeum vulgare</i> subsp. vulgare convar. vulgare | 6-row |
| 32826 | OMN | ITA | <i>Hordeum vulgare</i> subsp. vulgare convar. vulgare | 6-row |
| 32954 | OMN | GBR | <i>Hordeum vulgare</i> subsp. vulgare convar. vulgare | 6-row |
| 32962 | OMN | ITA | <i>Hordeum vulgare</i> subsp. vulgare convar. vulgare | 6-row |
| 32971 | OMN | ITA | <i>Hordeum vulgare</i> subsp. vulgare convar. vulgare | 6-row |
| 32977 | OMN | ITA | <i>Hordeum vulgare</i> subsp. vulgare convar. vulgare | 6-row |
| 33024 | DZA | SYR | <i>Hordeum vulgare</i> subsp. vulgare convar. vulgare | 6-row |
| 33055 | DZA | SYR | <i>Hordeum vulgare</i> subsp. vulgare convar. vulgare | 6-row |
| 33102 | DZA | SYR | <i>Hordeum vulgare</i> subsp. vulgare convar. vulgare | 6-row |
| 33195 | CHN | CHN | <i>Hordeum vulgare</i> subsp. vulgare convar. vulgare | 6-row |
| 33608 | CHN | CHN | <i>Hordeum vulgare</i> subsp. vulgare convar. vulgare | 6-row |
| 33649 | CHN | CHN | <i>Hordeum vulgare</i> subsp. vulgare convar. vulgare | 6-row |
| 34263 | CHN | CHN | <i>Hordeum vulgare</i> subsp. vulgare convar. vulgare | 6-row |
| 35382 | DZA | SYR | <i>Hordeum vulgare</i> subsp. vulgare convar. vulgare | 6-row |
| 35385 | DZA | SYR | <i>Hordeum vulgare</i> subsp. vulgare convar. vulgare | 6-row |
| 35386 | DZA | SYR | <i>Hordeum vulgare</i> subsp. vulgare convar. vulgare | 6-row |
| 35792 | CHN | CAN | <i>Hordeum vulgare</i> subsp. vulgare convar. vulgare | 6-row |
| 35794 | CHN | CAN | <i>Hordeum vulgare</i> subsp. vulgare convar. vulgare | 6-row |
| 35800 | CHN | CAN | <i>Hordeum vulgare</i> subsp. vulgare convar. vulgare | 6-row |
| 35803 | CHN | CAN | <i>Hordeum vulgare</i> subsp. vulgare convar. vulgare | 6-row |
| 35806 | CHN | CAN | <i>Hordeum vulgare</i> subsp. vulgare convar. vulgare | 6-row |
| 35808 | CHN | CAN | <i>Hordeum vulgare</i> subsp. vulgare convar. vulgare | 6-row |
| 35814 | CHN | CAN | <i>Hordeum vulgare</i> subsp. vulgare convar. vulgare | 6-row |
| 35820 | CHN | CAN | <i>Hordeum vulgare</i> subsp. vulgare convar. vulgare | 6-row |
| 35822 | CHN | CAN | <i>Hordeum vulgare</i> subsp. vulgare convar. vulgare | 6-row |
| 35823 | CHN | CAN | <i>Hordeum vulgare</i> subsp. vulgare convar. vulgare | 2-row |
| 35826 | CHN | CAN | <i>Hordeum vulgare</i> subsp. vulgare convar. vulgare | 6-row |
| 36052 | LBY | SYR | <i>Hordeum vulgare</i> subsp. vulgare convar. vulgare | 6-row |
| 37525 | PAK | USA | <i>Hordeum vulgare</i> subsp. vulgare convar. vulgare | 6-row |
| 37554 | LBY | ITA | <i>Hordeum vulgare</i> subsp. vulgare convar. vulgare | 6-row |
| 37556 | LBY | ITA | <i>Hordeum vulgare</i> subsp. vulgare convar. vulgare | 6-row |
| 37576 | LBY | ITA | <i>Hordeum vulgare</i> subsp. vulgare convar. vulgare | 6-row |

|        |     |     |                                                         |       |
|--------|-----|-----|---------------------------------------------------------|-------|
| 37726  | TUN | TUN | <i>Hordeum vulgare</i> subsp. vulgare convar. vulgare   | 6-row |
| 37729  | TUN | TUN | <i>Hordeum vulgare</i> subsp. vulgare convar. vulgare   | 6-row |
| 37784  | TUN | TUN | <i>Hordeum vulgare</i> subsp. vulgare convar. vulgare   | 6-row |
| 37813  | TUN | TUN | <i>Hordeum vulgare</i> subsp. vulgare convar. vulgare   | 6-row |
| 38214  | CHN | CAN | <i>Hordeum vulgare</i> subsp. vulgare convar. vulgare   | 6-row |
| 107010 | IRN | SYR | <i>Hordeum vulgare</i> subsp. vulgare convar. vulgare   | 6-row |
| 107020 | IRN | SYR | <i>Hordeum vulgare</i> subsp. vulgare convar. vulgare   | 6-row |
| 108499 | PAK | SYR | <i>Hordeum vulgare</i> subsp. vulgare convar. vulgare   | 6-row |
| 108911 | IRQ | IRQ | <i>Hordeum vulgare</i> subsp. vulgare convar. vulgare   | 6-row |
| 112483 | GEO | DEU | <i>Hordeum vulgare</i> subsp. vulgare convar. vulgare   | 6-row |
| 112715 | IRN | DEU | <i>Hordeum vulgare</i> subsp. vulgare convar. vulgare   | 6-row |
| 112840 | LBY | DEU | <i>Hordeum vulgare</i> subsp. vulgare convar. vulgare   | 6-row |
| 112865 | LBY | DEU | <i>Hordeum vulgare</i> subsp. vulgare convar. vulgare   | 6-row |
| 112931 | TUR | DEU | <i>Hordeum vulgare</i> subsp. vulgare convar. vulgare   | 6-row |
| 113084 | SAU | ITA | <i>Hordeum vulgare</i> subsp. vulgare convar. vulgare   | 2-row |
| 113120 | IRN | IRN | <i>Hordeum vulgare</i> subsp. vulgare convar. vulgare   | 6-row |
| 113126 | IRN | IRN | <i>Hordeum vulgare</i> subsp. vulgare convar. vulgare   | 6-row |
| 113128 | IRN | IRN | <i>Hordeum vulgare</i> subsp. vulgare convar. vulgare   | 6-row |
| 115919 | LBY | DEU | <i>Hordeum vulgare</i> subsp. vulgare convar. vulgare   | 6-row |
| 120565 | TKM | RUS | <i>Hordeum vulgare</i> subsp. vulgare convar. vulgare   | 6-row |
| 123901 | UZB | SYR | <i>Hordeum vulgare</i> subsp. vulgare convar. vulgare   | 6-row |
| 125827 | AZE | RUS | <i>Hordeum vulgare</i> subsp. vulgare convar. vulgare   | 6-row |
| 128122 | IRN | SYR | <i>Hordeum vulgare</i> subsp. vulgare convar. vulgare   | 6-row |
| 128124 | IRN | SYR | <i>Hordeum vulgare</i> subsp. vulgare convar. vulgare   | 6-row |
| 128125 | IRN | SYR | <i>Hordeum vulgare</i> subsp. vulgare convar. vulgare   | 6-row |
| 128133 | IRN | SYR | <i>Hordeum vulgare</i> subsp. vulgare convar. vulgare   | 6-row |
| 128158 | PAK | SYR | <i>Hordeum vulgare</i> subsp. vulgare convar. vulgare   | 6-row |
| 128159 | PAK | SYR | <i>Hordeum vulgare</i> subsp. vulgare convar. vulgare   | 6-row |
| 128160 | PAK | SYR | <i>Hordeum vulgare</i> subsp. vulgare convar. vulgare   | 6-row |
| 128170 | DZA | SYR | <i>Hordeum vulgare</i> subsp. vulgare convar. vulgare   | 6-row |
| 128187 | EGY | SYR | <i>Hordeum vulgare</i> subsp. vulgare convar. vulgare   | 6-row |
| 128199 | JOR | SYR | <i>Hordeum vulgare</i> subsp. vulgare convar. vulgare   | 6-row |
| 128204 | EGY | SYR | <i>Hordeum vulgare</i> subsp. vulgare convar. vulgare   | 6-row |
| 128218 | LBY | SYR | <i>Hordeum vulgare</i> subsp. vulgare convar. vulgare   | 6-row |
| 135258 | JOR | SYR | <i>Hordeum vulgare</i> subsp. vulgare convar. vulgare   | 6-row |
| 135528 | TKM | SYR | <i>Hordeum vulgare</i> subsp. vulgare convar. vulgare   | 6-row |
| 137761 | TJK | SYR | <i>Hordeum vulgare</i> subsp. vulgare convar. vulgare   | 6-row |
| 22957  | ETH | USA | <i>Hordeum vulgare</i> subsp. vulgare convar. distichon | 2-row |
| 27892  | SAU | USA | <i>Hordeum vulgare</i> subsp. vulgare convar. distichon | 2-row |
| 17406  | BIH | USA | <i>Hordeum vulgare</i> subsp. vulgare convar. vulgare   | 2-row |
| 17410  | BIH | USA | <i>Hordeum vulgare</i> subsp. vulgare convar. vulgare   | 2-row |
| 19620  | ALB | USA | <i>Hordeum vulgare</i> subsp. vulgare convar. vulgare   | 2-row |
| 20900  | AFG | USA | <i>Hordeum vulgare</i> subsp. vulgare convar. vulgare   | 2-row |
| 22912  | ETH | USA | <i>Hordeum vulgare</i> subsp. vulgare convar. vulgare   | 2-row |



|        |     |     |                                                       |       |
|--------|-----|-----|-------------------------------------------------------|-------|
| 24720  | TKM | USA | <i>Hordeum vulgare</i> subsp. vulgare convar. vulgare | 2-row |
| 25095  | CHN | USA | <i>Hordeum vulgare</i> subsp. vulgare convar. vulgare | 2-row |
| 25327  | CHN | USA | <i>Hordeum vulgare</i> subsp. vulgare convar. vulgare | 2-row |
| 25710  | IND | USA | <i>Hordeum vulgare</i> subsp. vulgare convar. vulgare | 2-row |
| 25843  | EGY | USA | <i>Hordeum vulgare</i> subsp. vulgare convar. vulgare | 2-row |
| 25947  | CHN | USA | <i>Hordeum vulgare</i> subsp. vulgare convar. vulgare | 2-row |
| 25961  | CHN | USA | <i>Hordeum vulgare</i> subsp. vulgare convar. vulgare | 2-row |
| 27655  | IRN | USA | <i>Hordeum vulgare</i> subsp. vulgare convar. vulgare | 2-row |
| 27784  | IRN | USA | <i>Hordeum vulgare</i> subsp. vulgare convar. vulgare | 2-row |
| 28674  | TUR | USA | <i>Hordeum vulgare</i> subsp. vulgare convar. vulgare | 2-row |
| 28693  | TUR | USA | <i>Hordeum vulgare</i> subsp. vulgare convar. vulgare | 2-row |
| 28865  | DEU | USA | <i>Hordeum vulgare</i> subsp. vulgare convar. vulgare | 2-row |
| 29057  | SYR | SYR | <i>Hordeum vulgare</i> subsp. vulgare convar. vulgare | 2-row |
| 31396  | SYR | SYR | <i>Hordeum vulgare</i> subsp. vulgare convar. vulgare | 2-row |
| 31412  | SYR | SYR | <i>Hordeum vulgare</i> subsp. vulgare convar. vulgare | 2-row |
| 32687  | EGY | SYR | <i>Hordeum vulgare</i> subsp. vulgare convar. vulgare | 2-row |
| 32694  | EGY | SYR | <i>Hordeum vulgare</i> subsp. vulgare convar. vulgare | 2-row |
| 32756  | SYR | SYR | <i>Hordeum vulgare</i> subsp. vulgare convar. vulgare | 2-row |
| 32774  | SYR | SYR | <i>Hordeum vulgare</i> subsp. vulgare convar. vulgare | 2-row |
| 32812  | EGY | SYR | <i>Hordeum vulgare</i> subsp. vulgare convar. vulgare | 2-row |
| 32814  | OMN | ITA | <i>Hordeum vulgare</i> subsp. vulgare convar. vulgare | 2-row |
| 32978  | OMN | ITA | <i>Hordeum vulgare</i> subsp. vulgare convar. vulgare | 2-row |
| 33094  | SYR | SYR | <i>Hordeum vulgare</i> subsp. vulgare convar. vulgare | 2-row |
| 35220  | SYR | SYR | <i>Hordeum vulgare</i> subsp. vulgare convar. vulgare | 2-row |
| 35236  | SYR | SYR | <i>Hordeum vulgare</i> subsp. vulgare convar. vulgare | 2-row |
| 36058  | TJK | SYR | <i>Hordeum vulgare</i> subsp. vulgare convar. vulgare | 2-row |
| 37608  | YEM | ITA | <i>Hordeum vulgare</i> subsp. vulgare convar. vulgare | 2-row |
| 37612  | YEM | ITA | <i>Hordeum vulgare</i> subsp. vulgare convar. vulgare | 2-row |
| 112781 | IRN | DEU | <i>Hordeum vulgare</i> subsp. vulgare convar. vulgare | 2-row |
| 113076 | SAU | ITA | <i>Hordeum vulgare</i> subsp. vulgare convar. vulgare | 2-row |
| 113082 | SAU | ITA | <i>Hordeum vulgare</i> subsp. vulgare convar. vulgare | 2-row |
| 113095 | YEM | ITA | <i>Hordeum vulgare</i> subsp. vulgare convar. vulgare | 2-row |
| 128088 | AFG | SYR | <i>Hordeum vulgare</i> subsp. vulgare convar. vulgare | 2-row |
| 128172 | SYR | SYR | <i>Hordeum vulgare</i> subsp. vulgare convar. vulgare | 2-row |
| 128173 | SYR | SYR | <i>Hordeum vulgare</i> subsp. vulgare convar. vulgare | 2-row |
| 128200 | JOR | SYR | <i>Hordeum vulgare</i> subsp. vulgare convar. vulgare | 2-row |
| 128202 | JOR | SYR | <i>Hordeum vulgare</i> subsp. vulgare convar. vulgare | 2-row |
| 131668 | TJK | SYR | <i>Hordeum vulgare</i> subsp. vulgare convar. vulgare | 2-row |
| 38215  | CHN | CAN | <i>Hordeum vulgare</i> subsp. spontaneum              | 2-row |
| 38611  | SYR | SYR | <i>Hordeum vulgare</i> subsp. spontaneum              | 2-row |
| 38638  | SYR | ITA | <i>Hordeum vulgare</i> subsp. spontaneum              | 2-row |
| 38660  | AFG | USA | <i>Hordeum vulgare</i> subsp. spontaneum              | 2-row |
| 38669  | AFG | USA | <i>Hordeum vulgare</i> subsp. spontaneum              | 2-row |
| 38672  | TUR | USA | <i>Hordeum vulgare</i> subsp. spontaneum              | 2-row |

|        |     |     |                                               |       |
|--------|-----|-----|-----------------------------------------------|-------|
| 38693  | PAK | SYR | <i>Hordeum vulgare</i> subsp. spontaneum      | 2-row |
| 38956  | PAL | USA | <i>Hordeum vulgare</i> subsp. spontaneum      | 2-row |
| 39126  | PAL | USA | <i>Hordeum vulgare</i> subsp. spontaneum      | 2-row |
| 39540  | LBN | USA | <i>Hordeum vulgare</i> subsp. spontaneum      | 2-row |
| 39802  | PAK | SWE | <i>Hordeum vulgare</i> subsp. spontaneum      | 2-row |
| 39847  | SYR | SYR | <i>Hordeum vulgare</i> subsp. spontaneum      | 2-row |
| 39857  | SYR | SYR | <i>Hordeum vulgare</i> subsp. spontaneum      | 2-row |
| 39891  | EGY | SYR | <i>Hordeum vulgare</i> subsp. spontaneum      | 2-row |
| 40021  | JOR | SYR | <i>Hordeum vulgare</i> subsp. spontaneum      | 2-row |
| 40022  | JOR | SYR | <i>Hordeum vulgare</i> subsp. spontaneum      | 2-row |
| 40031  | JOR | SYR | <i>Hordeum vulgare</i> subsp. spontaneum      | 2-row |
| 40034  | JOR | SYR | <i>Hordeum vulgare</i> subsp. spontaneum      | 2-row |
| 40035  | JOR | SYR | <i>Hordeum vulgare</i> subsp. spontaneum      | 2-row |
| 40039  | JOR | SYR | <i>Hordeum vulgare</i> subsp. spontaneum      | 2-row |
| 40056  | JOR | SYR | <i>Hordeum vulgare</i> subsp. spontaneum      | 2-row |
| 40059  | JOR | SYR | <i>Hordeum vulgare</i> subsp. spontaneum      | 2-row |
| 40064  | JOR | SYR | <i>Hordeum vulgare</i> subsp. spontaneum      | 2-row |
| 40071  | JOR | SYR | <i>Hordeum vulgare</i> subsp. spontaneum      | 2-row |
| 40072  | JOR | SYR | <i>Hordeum vulgare</i> subsp. spontaneum      | 2-row |
| 40082  | SYR | SYR | <i>Hordeum vulgare</i> subsp. spontaneum      | 2-row |
| 40101  | TKM | SYR | <i>Hordeum vulgare</i> subsp. spontaneum      | 2-row |
| 40104  | TKM | SYR | <i>Hordeum vulgare</i> subsp. spontaneum      | 2-row |
| 107046 | IRN | SYR | <i>Hordeum vulgare</i> subsp. spontaneum      | 2-row |
| 107427 | IRQ | SYR | <i>Hordeum vulgare</i> subsp. spontaneum      | 2-row |
| 110742 | SYR | SYR | <i>Hordeum vulgare</i> subsp. spontaneum      | 2-row |
| 112787 | IRN | DEU | <i>Hordeum vulgare</i> subsp. spontaneum      | 2-row |
| 115781 | JOR | SYR | <i>Hordeum vulgare</i> subsp. spontaneum      | 2-row |
| 120794 | TKM | JPN | <i>Hordeum vulgare</i> subsp. spontaneum      | 2-row |
| 132606 | AZE | SYR | <i>Hordeum vulgare</i> subsp. spontaneum      | 2-row |
| 135507 | TKM | SYR | <i>Hordeum vulgare</i> subsp. spontaneum      | 2-row |
| 135536 | TKM | SYR | <i>Hordeum vulgare</i> subsp. spontaneum      | 2-row |
| 135624 | TKM | SYR | <i>Hordeum vulgare</i> subsp. spontaneum      | 2-row |
| 138223 | UNK | SYR | Zanbakian                                     | 2-row |
| 138218 | UNK | SYR | WI 2291                                       | 2-row |
| 138272 | UNK | SYR | UM (Zanbaka//SLB45-40/H.spont.41-1)           | 2-row |
| 138274 | UNK | SYR | UM (SLB39-39/H.spont.41-5)                    | 2-row |
| 138273 | UNK | SYR | UM (SLB12-59//SLB45-40/H.spont.41-5)          | 2-row |
| 138277 | UNK | SYR | UM (SLB05-96/H.spont.41-5)                    | 2-row |
| 138276 | UNK | SYR | UM (SLB05-96//H.spont.41-1/Tadmor)            | 2-row |
| 138270 | UNK | SYR | UM (PI386540/ArabiAbiad//H.spont.41-1/Tadmor) | 2-row |
| 138255 | LBY | SYR | UM (M126/CM67//As/Pro/3/Alanda)               | 6-row |
| 138271 | UNK | SYR | UM (Hml//H.spont.41-1/Tadmor)                 | 2-row |
| 138214 | UNK | SYR | UM (Harmal-02//Esp/1808-4L (P2))              | 2-row |
| 138275 | UNK | SYR | UM (H.spont.41-5/Tadmor//Hml-02/Lignee131)    | 2-row |

|        |     |     |                                |       |
|--------|-----|-----|--------------------------------|-------|
| 138268 | UNK | SYR | UM (H.spont.41-1/Tadmor)       | 2-row |
| 138266 | UNK | SYR | UM (Arta//H.spont.41-5/Tadmor) | 2-row |
| 138267 | UNK | SYR | UM (Arta//H.spont.41-5/Tadmor) | 2-row |
| 138211 | UNK | SYR | UM                             | 2-row |
| 138212 | UNK | SYR | UM                             | 2-row |
| 138213 | UNK | SYR | UM                             | 2-row |
| 138269 | UNK | SYR | UM                             | 2-row |
| 138220 | UNK | SYR | SLB 05-96                      | 2-row |
| 138242 | UNK | SYR | Salmas                         | 2-row |
| 138251 | UNK | SYR | Sadik-2                        | 2-row |
| 138250 | UNK | SYR | Sadik-1                        | 2-row |
| 138252 | UNK | SYR | Pamir 9                        | 2-row |
| 138221 | UNK | SYR | Moroc 9-75                     | 2-row |
| 138240 | UNK | SYR | Matnan-01                      | 6-row |
| 138224 | UNK | SYR | Harmal                         | 2-row |
| 138217 | UNK | SYR | ER/Apm                         | 2-row |
| 138237 | TUR | SYR | CV (Tokak)                     | 2-row |
| 138230 | DZA | SYR | CV (Tichedrett)                | 6-row |
| 138265 | LBY | SYR | CV (Tarida)                    | 2-row |
| 138262 | ETH | SYR | CV (Shege)                     | 6-row |
| 138229 | DZA | SYR | CV (Saida)                     | 6-row |
| 138236 | JOR | SYR | CV (Rum)                       | 6-row |
| 138238 | RUS | SYR | CV (Radical)                   | 2-row |
| 138228 | TUN | SYR | CV (Martin)                    | 6-row |
| 138244 | CYP | SYR | CV (Mari/Aths*2)               | 6-row |
| 138231 | TUN | SYR | CV (Manel)                     | 6-row |
| 138257 | LBN | SYR | CV (Litani)                    | 2-row |
| 138260 | AUS | SYR | CV (Keel)                      | 2-row |
| 138253 | LBY | SYR | CV (Katara)                    | 6-row |
| 138234 | IRQ | SYR | CV (IPA7)                      | 6-row |
| 138247 | EGY | SYR | CV (Giza 126)                  | 6-row |
| 138246 | EGY | SYR | CV (Giza 125)                  | 6-row |
| 138259 | SYR | SYR | CV (Furat3)                    | 2-row |
| 138249 | SYR | SYR | CV (Furat 2)                   | 2-row |
| 138248 | SYR | SYR | CV (Furat 1)                   | 6-row |
| 138233 | FRA | SYR | CV (Express)                   | 2-row |
| 138263 | ERI | SYR | CV (Demhay)                    | 2-row |
| 138243 | EGY | SYR | CV (CalM)                      | 6-row |
| 138239 | TUR | SYR | CV (Bulbul)                    | 2-row |
| 138261 | AUS | SYR | CV (Barque)                    | 2-row |
| 138254 | LBY | SYR | CV (Barjouj)                   | 6-row |
| 138264 | ERI | SYR | CV (Atsa)                      | 2-row |
| 138245 | GRC | SYR | CV (Aths)                      | 6-row |
| 138235 | MAR | SYR | CV (Arig8)                     | 6-row |

|           |     |     |           |       |
|-----------|-----|-----|-----------|-------|
| 138215    | SYR | SYR | CV        | 2-row |
| 138216    | SYR | SYR | CV        | 2-row |
| 138219    | SYR | SYR | CV        | 2-row |
| 138222    | SYR | SYR | CV        | 2-row |
| 138225    | SYR | SYR | CV        | 2-row |
| 138226    | SYR | SYR | CV        | 6-row |
| 140405    | TJK | SYR | CV        | 2-row |
| BMZ05-228 | UNK | SYR | CV        | 2-row |
| BMZ05-229 | UNK | SYR | CV        | 2-row |
| BMZ05-230 | UNK | SYR | CV        | 6-row |
| BMZ05-231 | UNK | SYR | CV        | 2-row |
| BMZ05-232 | UNK | SYR | CV        | 2-row |
| BMZ05-233 | UNK | SYR | CV        | 2-row |
| BMZ05-234 | UNK | SYR | CV        | 2-row |
| BMZ05-235 | UNK | SYR | CV        | 6-row |
| BMZ05-236 | UNK | SYR | CV        | 2-row |
| BMZ05-237 | UNK | SYR | CV        | 6-row |
| BMZ05-238 | UNK | SYR | CV        | 6-row |
| BMZ05-239 | UNK | SYR | CV        | 6-row |
| BMZ05-240 | UNK | SYR | CV        | 2-row |
| BMZ05-241 | UNK | SYR | CV        | 6-row |
| 138258    | UNK | SYR | Birlik    | 2-row |
| 138256    | UNK | SYR | Batal-1   | 2-row |
| 138232    | UNK | SYR | Badia     | 6-row |
| 138241    | UNK | SYR | Assala-04 | 6-row |
| 138227    | UNK | SYR | Alanda-01 | 6-row |

---

<sup>a</sup>Standard code for country of origin, e.g. ALB=Albania, AFG=Afghanistan, AZE=Azerbaijan, BIH=Bosnia and Herzegovina, CHN=China, DEU=Deutschland, DZA= Algeria, EGY= Egypt, ETH= Ethiopia, GEO=Georgia, GRC=Greece, IND= India, IRN= Iran, IRQ= Iraq, JOR= Jordan, LBN= Lebanon, LBY= Libya, MAR= Morocco, OMN= Oman, PAK=Pakistan, PAL= Palestine, RUS= Russia, SAU=Saudi Arabia, SYR= Syria, SCG=Serbia and montenegro, TJK= Tajikistan, TKM=Turkmenistan, TUN= Tunis, TUR=Turkey, UZB= Uzbekistan, YEM=Yemen, UNK= Unknown.

**Table S4 SSR marker information used in the evaluation of population structure**

| Chromosome | Marker name | Forward primer sequence (5'→3') | Revers primer sequence (5'→3') |
|------------|-------------|---------------------------------|--------------------------------|
| 1H         | Bmac90      | ACATCAACCCTCCTGCTC              | CCGCACATAGTGGTTACATC           |
| 1H         | Bmag105     | AATCAGACCCATCAGAGGT             | CCGGTCTCATAGAAATGG             |
| 1H         | HVALAAT     | TACATACAACCCTCATGGG             | AAGGATGACATGGCTTTG             |
| 2H         | Bmag125     | AATTAGCGAGAACAAAATCAC           | AGATAACGATGCACCACC             |
| 2H         | Ebmac415    | GAAACCCATCATAGCAGC              | AAACAGCAGCAAGAGGAG             |
| 2H         | HVBKASI     | ATTGGCGTGACCGATATTTATGTTCA      | CAAAACTGCAGCTAAGCAGGGGAACA     |
| 3H         | Bmag13      | AAGGGGAATCAAAATGGGAG            | TCGAATAGGTCTCCGAAGAA           |
| 3H         | HVLTPPB     | AGACGCTGAGTACGTTGAG             | CAAAGTACAACAACTCACGA           |
| 3H         | Hvm33       | ATATTA AAAAAGGTGGAAAGCC         | CACGCCCTCTCCCTAGAT             |
| 4H         | Bmac30      | CCCAATCGGAGTTACAGATG            | GCCTCTCTGAGAATGGATC            |
| 4H         | Gms89       | TGAAGTGGAAGGCTTCGC              | GCTCTCGTTGTGCGGAG              |
| 4H         | HVMLOH1A    | CCTCCCCTCTGATATGATAA            | GTACAGACGGTTTAATTGTCC          |
| 5H         | Bmag5       | TCCATGATGATGTGTGCATAGA          | CGGATCCCAACAAACACAC            |
| 5H         | Gms1        | CTGACCCTTTGCTTAACATGC           | TCAGCGTGACAAACAATAAAGG         |
| 5H         | HVLOX       | CAGCATATCCATCTGATCTG            | CACCCTTATTATTGCCTTAA           |
| 6H         | Bmac316     | ATGGTAGAGGTCCCAACTG             | ATCACTGCTGTGCCTAGC             |
| 6H         | Hvm74       | AGGAAGTCATTGCGTGAG              | TGATCAAGAATGATAACATGG          |
| 6H         | Scssr5599   | TTCCATCATAACAGCAATGG            | TTCGTCTGAAGGCTATGTAGG          |
| 7H         | Bmac156     | AACCGAATGTATTCTCTGTGTA          | GCCAAACA ACTATCGTGAC           |
| 7H         | Bmag11      | ACAAAAACACCGCAAAGAAGA           | GCTAGTACCTAGATGACCCCC          |
| 7H         | HVAMY2      | CTGTAAGTGAGACAATCGACA           | CAGTTGAACCCCTGAAAAG            |

Primer sequences and locations for SSRs used in this study were obtained from the GrainGenes database (<http://www.wheat.pw.usda.gov/GG2/index.shtml>).
